# Supplementary material for: Removal of a Membrane Anchor Reveals the Opposing Regulatory Functions of Vibrio cholerae Glucose-Specific Enzyme IIA in Biofilms and the Mammalian Intestine
Source: PubMed Central journal article supplement (PMC6123446; doi:10.1128/mbio.00858-18), 2018-09-04
Supplement: mbo004184039sf7.pdf [file mbo004184039sf7.pdf]

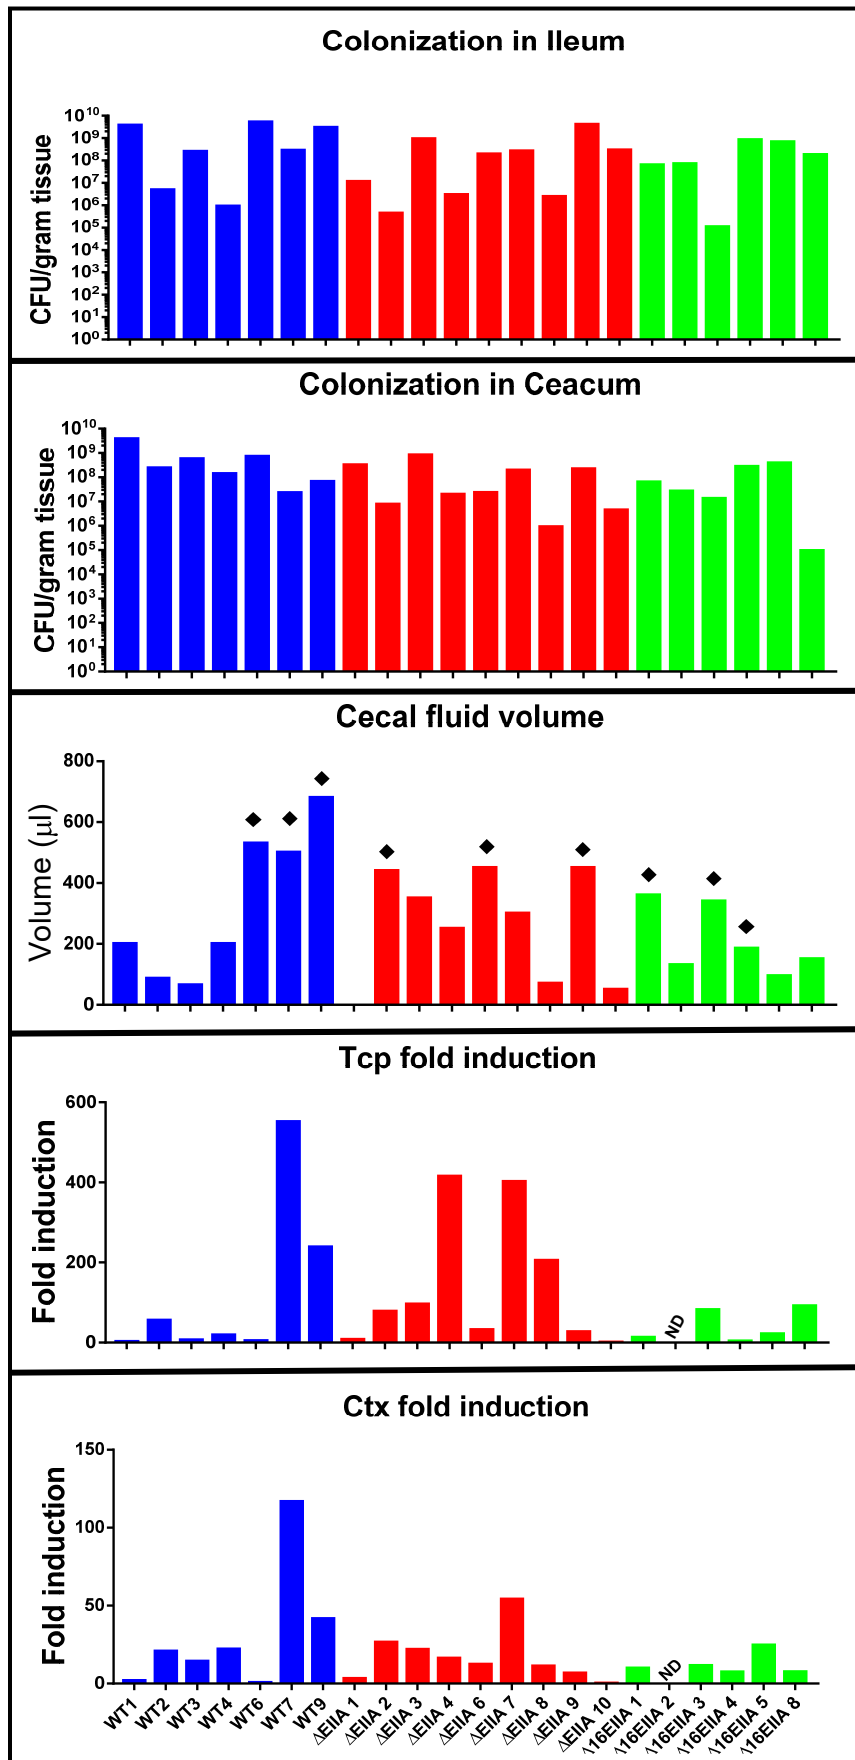

**Fig S7: Characteristics of individual infant rabbits from which cecal fluid was harvested for metabolomic analysis.** Panels show colonization, cecal fluid accumulation, *ctx* transcription, and *tcpA* transcription for individual infant rabbits. Diamonds denote infant rabbits from which cecal fluid was harvested for metabolomics studies. ND indicates not done. WT 1-5,  $\Delta$ EIIA 1-2, and  $\Delta$ 16 1-2 came from litter 1. WT 6-9,  $\Delta$ EIIA 3-10, and  $\Delta$ 16 3-8 came from litter 2.
